# Supplementary material for: One-step fabrication of polymeric hybrid particles with core–shell, patchy, patchy Janus and Janus architectures via a microfluidic-assisted phase separation process
Source: Royal Society of Chemistry journal article supplement (doi:10.1039/c5ra16504k), 2015-01-01
Supplement: c5ra16504k1.pdf [file c5ra16504k1.pdf]

Supporting Information

## One-Step Fabrication of Polymeric Hybrid Particles with Core-Shell, Patchy, Patchy Janus and Janus Architectures via Microfluidic- Assisted Phase Separation Process

Xiaodong Cao <sup>1, 2, 3</sup>, Wenxiu Li <sup>1, 2, 3</sup>, Ting Ma <sup>1, 2</sup>, Hua Dong <sup>1, 2, 3, \*</sup>

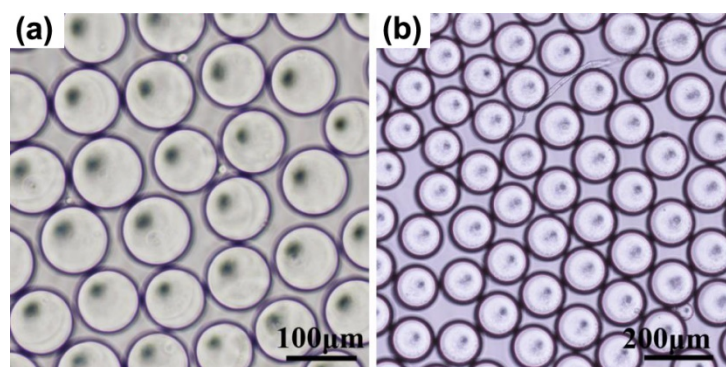

**Figure S1.** Optical images of monodisperse PLGA/PCL droplets collected at the outlet of microfluidic devices. The solvents used in (a) and (b) were dimethyl carbonate and dichloromethane, respectively.

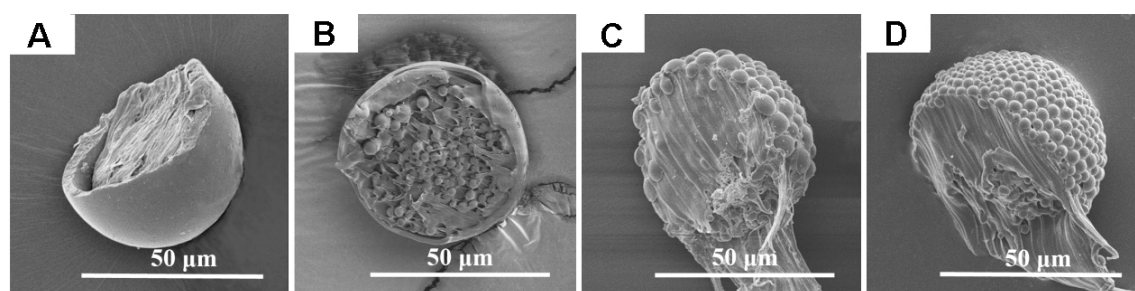

**Figure S2.** SEM images of cross-sectioned core-shell and patchy PLGA/PCL particles produced with different mass ratios of PLGA and PCL: (A) 7:3, (B) 5:5, (C) 3:7 and (D) 2:8. Dichloromethane was used as the solvent of the dispersed phase and the flow rates of the dispersed phase and continuous phase were 0.25 and 0.45 mL h<sup>-1</sup>, respectively.

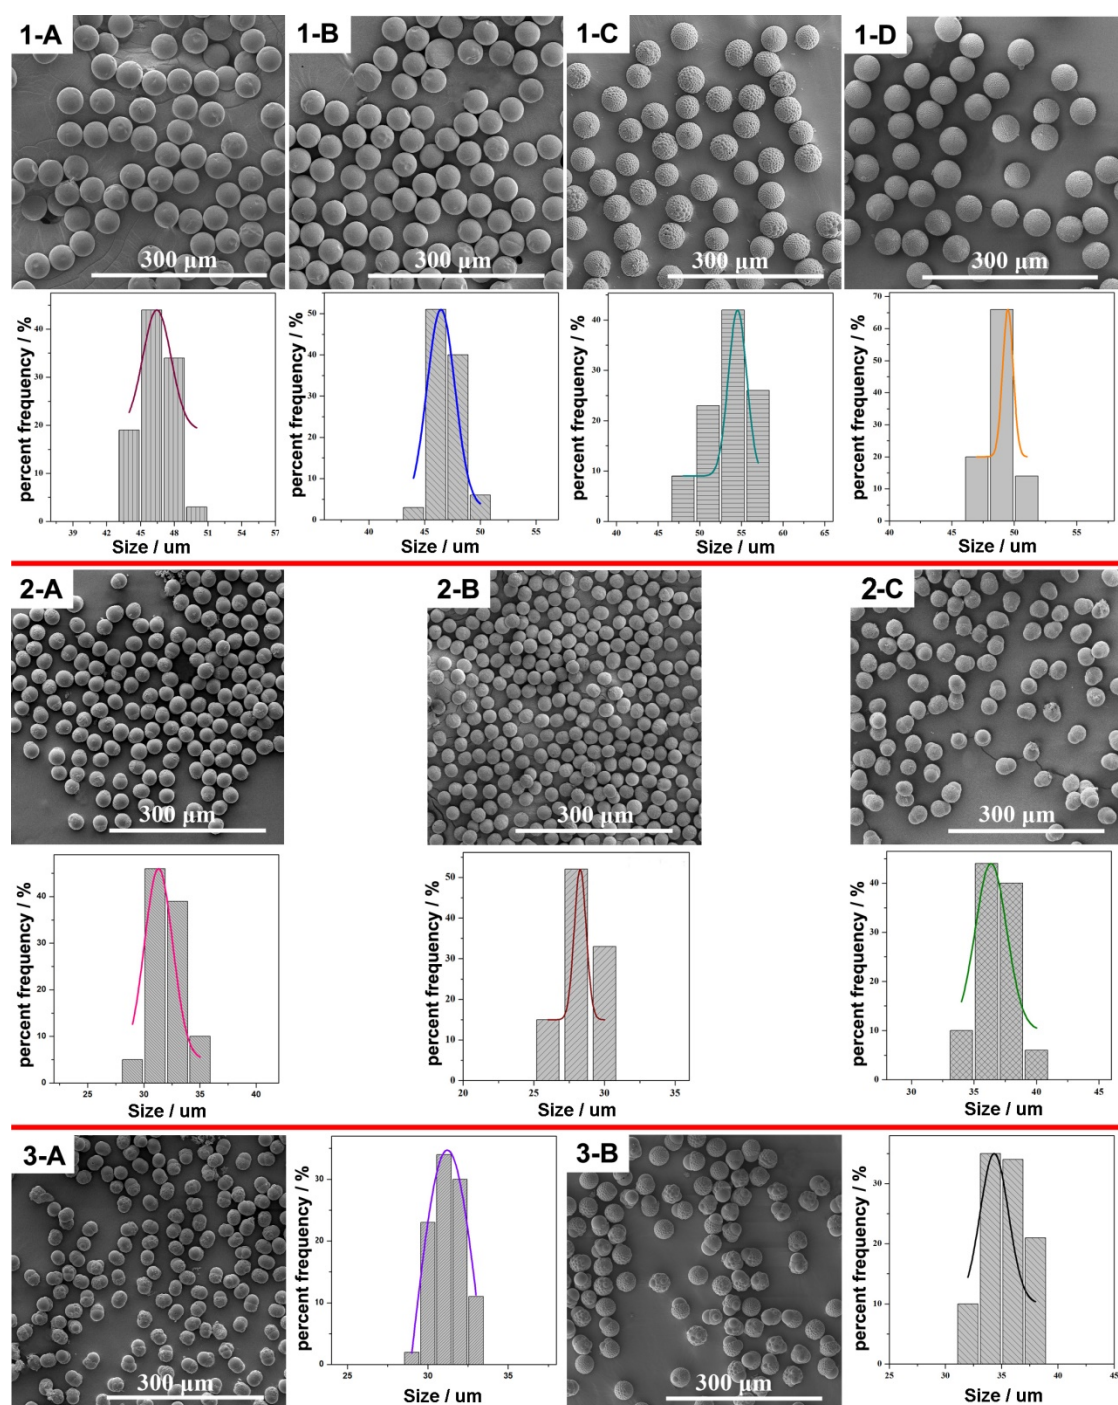

**Figure S2.** SEM images and size distribution of PLGA/PCL particles reported in the text: 1-A, 1-B, 1-C and 1-D correspond to particles shown in Figure 1(A-D), 2-A, 2-B and 2-C correspond to particles shown in Figure 2(A-C), 3-A and 3-B correspond to particles shown in Figure 3(A-B).

**Table S1.** Average diameter and coefficient of variation for various particles

| Particle type & label | Average diameter ( $\mu\text{m}$ ) | Coefficient of variation (%) |
|-----------------------|------------------------------------|------------------------------|
| Corel-shell (1-A)     | 45.1                               | 3.40                         |
| Corel-shell (1-B)     | 47.0                               | 2.70                         |
| Patchy (1-C)          | 52.5                               | 4.50                         |
| Patchy (1-D)          | 48.8                               | 2.17                         |
| Patchy Janus (3-A)    | 30.8                               | 3.30                         |
| Patchy Janus (3-B)    | 35.4                               | 2.00                         |
| Janus (2-A)           | 32.1                               | 4.00                         |
| Janus (2-B)           | 28.4                               | 4.25                         |
| Janus (2-C)           | 36.7                               | 3.70                         |

Note: Average particle size and size distribution was measured by choosing randomly fifty particles in SEM images.

**Table S2.** Calculation of interfacial tension between PLGA and PCL in dimethyl carbonate system

| Materials | Testing systems    | Contact angle ( $^{\circ}$ ) | Surface energy (mN/m) | Interfacial tension (mN/m) |
|-----------|--------------------|------------------------------|-----------------------|----------------------------|
| PLGA      | Water-PLGA         | 85.5                         | 37.28                 | 7.48                       |
|           | Diiodomethane-PLGA | 44.5                         |                       |                            |
| PCL       | Water-PCL          | 102.7                        | 44.76                 |                            |
|           | Diiodomethane-PCL  | 38.8                         |                       |                            |

Additional note: PLGA and PCL solutions were first spin-coated on clean glass slides to form a uniform film after solvent evaporation. Then, two standard probe liquids (pure water and diiodomethane) with well-known surface energy ( $\gamma_L$ ), dispersive ( $\gamma_L^d$ ) and polar component ( $\gamma_L^p$ ), were dropped on the surface of polymer film for contact angle measurements (OCA15, Data Physics Instruments GmbH). According to the classic Owens-Wendt-Kaelble (OWK) equation,

$$\gamma_L(1 + \cos \theta) = 2\sqrt{\gamma_S^d \gamma_L^d} + 2\sqrt{\gamma_S^p \gamma_L^p}$$

The dispersive ( $\gamma_S^d$ ) and the polar component ( $\gamma_S^p$ ) of PLGA and PCL could be obtained, and their surface energy were calculated as  $\gamma_S = \gamma_S^d + \gamma_S^p$ . The interfacial tension between PLGA and

PCL is the D-value between the surface energy of PLGA and PCL. These data were summarized in Table S2.
